# Supplementary material for: Carrot Consumption Frequency Associated with Reduced BMI and Obesity through the SNP Intermediary rs4445711
Source: MDPI journal article supplement (doi:10.3390/nu13103478), 2021-09-30
Supplement: s1 [file s1]

**Supplemental table S1.** Interactions between rs4445711 and the frequency of various types of vegetable intake on body mass index

|                        | CHR | SNP       | Position  | EA | NEA | BETA     | SE      | <i>P</i>                |
|------------------------|-----|-----------|-----------|----|-----|----------|---------|-------------------------|
| Carrot                 | 12  | rs4445711 | 104636601 | G  | A   | -0.1682  | 0.03073 | 4.53 x 10 <sup>-8</sup> |
| Broccoli               | 12  | rs4445711 | 104636601 | G  | A   | -0.07813 | 0.04403 | 0.0760                  |
| Spinach                | 12  | rs4445711 | 104636601 | G  | A   | -0.04899 | 0.03784 | 0.195                   |
| Other green vegetables | 12  | rs4445711 | 104636601 | G  | A   | -0.1326  | 0.04213 | 1.66 x 10 <sup>-3</sup> |
| Pumpkin                | 12  | rs4445711 | 104636601 | G  | A   | -0.1271  | 0.04513 | 4.86 x 10 <sup>-3</sup> |
| Cabbage                | 12  | rs4445711 | 104636601 | G  | A   | -0.1003  | 0.04125 | 0.0151                  |

CHR—chromosome; SNP—single nucleotide polymorphism; EA—effect allele; NEA— non-effect allele; BETA—beta-interaction; SE—standard error; *P*—p-value.
